# Supplementary material for: Deficiency and overexpression of Rtl1 in the mouse cause distinct muscle abnormalities related to Temple and Kagami-Ogata syndromes
Source: Oxford University Press journal article supplement (doi:10.1242/dev.185918), 2020-09-02
Supplement: dev185918supp.pdf [file dev185918supp.pdf]

**Table S1. Abdominal abnormalities reported in human upd(14)pat patients.**

| This case                               | Abdomen                                          |
|-----------------------------------------|--------------------------------------------------|
| Mattes et al. 2007                      | Diastasis recti, hepatomegaly                    |
| Curtis et al. 2006                      | Protruding abdomen                               |
| Kagami et al. 2005                      | Diastasis recti                                  |
| Kagami et al. 2005                      | Omphalocele                                      |
| Kagami et al. 2005                      | Diastasis recti                                  |
| Stevenson et al. 2004                   | Diastasis recti, gastrostomy                     |
| Kurosawa et al. 2002                    | Diastasis recti, hypoplastic ilia                |
| Kurosawa et al. 2002                    | Diastasis recti, hypoplastic ilia                |
| Kurosawa et al. 2002                    | Diastasis recti, hypoplastic ilia                |
| Towner et al. 2001, Coveler et al. 2002 | Ventral hernias, omphalocele, undescended testes |
| McPherson et al. 2001, Chu et al. 2004  | Diastasis recti, hypospadias, short ilia         |
| Yano et al. 2001                        | Abdominal wall hernias                           |
| Cotter et al. 1997                      | Abdominal wall hernia, hepatosplenomegaly        |
| Papenhausen et al. 1995                 | Abdominal wall hernia                            |

|                         |   |
|-------------------------|---|
| • Diastasis recti       | 8 |
| • Omphalocele           | 2 |
| • Ventral hernia        | 1 |
| • Abdominal wall hernia | 3 |

Total number of patients = 19

The lower part of the column has a summary of the abdominal abnormalities.

**Table S2. Thorax abnormalities reported in human upd(14)pat patients.**

| This case                               | Thorax                                                                                                                                                                          |
|-----------------------------------------|---------------------------------------------------------------------------------------------------------------------------------------------------------------------------------|
| Mattes et al. 2007                      | Small bell-shaped thorax, coat hanger shaped ribs, respiratory failure and need ventilation, elongated clavicles, lung hypoplasia, pulmonary hypertension, increased secretions |
| Curtis et al. 2006                      | Small bell-shaped thorax, coat hanger shaped ribs, respiratory failure and need ventilation                                                                                     |
| Kagami et al. 2005                      | Small bell-shaped thorax, coat hanger shaped ribs, respiratory failure and need ventilation                                                                                     |
| Kagami et al. 2005                      | Small bell-shaped thorax, coat hanger shaped ribs, respiratory failure and need ventilation, ASD                                                                                |
| Kagami et al. 2005                      | Small bell-shaped thorax, coat hanger shaped ribs, respiratory failure and need ventilation, laryngomalacia                                                                     |
| Stevenson et al. 2004                   | Coat hanger shaped ribs, respiratory failure, narrow scapular neck, inverted nipples, increased oral secretions, pulmonary artery stenosis                                      |
| Offiah et al. 2003                      | Small bell-shaped thorax, coat hanger shaped ribs, cupped anterior ends of ribs, widely spaced nipples, absent glenoid fossae, abnormal costochondral junctions, VSD            |
| McGowan et al. 2002                     | Pectus excavatum, respiratory failure, hypertrophic cardiomyopathy, curved ribs                                                                                                 |
| Kurosawa et al. 2002                    | Narrow thorax, short wavy ribs, respiratory failure and ventilation                                                                                                             |
| Kurosawa et al. 2002                    | Narrow thorax, short wavy ribs, respiratory failure and ventilation                                                                                                             |
| Kurosawa et al. 2002                    | Narrow thorax, short wavy ribs, respiratory failure and ventilation                                                                                                             |
| Towner et al. 2001, Coveler et al. 2002 | small bell-shaped thorax, respiratory failure and ventilation, Pulmonary hypoplasia, pulmonary stenosis, ASD, VSD                                                               |
| McPherson et al. 2001, Chu et al. 2004  | Bell-shaped thorax, curved ribs, respiratory failure                                                                                                                            |
| Cotter et al. 1997                      | Small and bell-shaped thorax, curved ribs, ventilation, elongated clavicles, restrictive lung disease, cardiomyopathy                                                           |
| Walter et al. 1996                      | Small and bell-shaped thorax, abnormal ribs, ventilation, prominent sternum, hypoplastic nipples, hypertrophic cardiomyopathy, ASD                                              |
| Wang et al. 1991                        | Small and bell-shaped thorax, angulated ribs, restrictive lung disease                                                                                                          |

|                            |        |
|----------------------------|--------|
| · Small bell-shaped thorax | 11 (9) |
| · Narrow thorax            | 3 (3)  |

Total number of patients = 19  
( ): respiratory failure

The lower part of column has a summary of thorax abnormalities. Eleven of the 19 patients exhibited a small, bell-shaped thorax including 9 cases of respiratory failure. Three of the 19 patients exhibited a narrow thorax, including 3 cases of respiratory failure.

**Table S3. Musculoskeletal abnormalities reported in human upd(14)mat patients.**

|                                |                                                                                  |
|--------------------------------|----------------------------------------------------------------------------------|
| This case                      | Musculoskeletal                                                                  |
| Gillessen-Kaesbach et al. 2018 | Hypotonia, feeding problems, motor delay                                         |
| Zhang et al. 2016              | Hypotonia, feeding difficulties, scoliosis                                       |
| Stalman et al. 2015            | Hypotonia, motor developmental delay, hyperextensible joints                     |
| Hosoki et al. 2009             | Hypotonia                                                                        |
| Mitter et al. 2006             | Hypotonia, feeding problems, motor delay, hyperextensible joints                 |
| Cox et al. 2004                | Hypotonia, feeding problems                                                      |
| Manzoni et al. 2000            | Motor delay                                                                      |
| Martin et al. 1999             | Hypotonia, motor and speech delays, joint laxity                                 |
| Hordijk et al. 1999            | Hypotonia, feeding problems, motor delay                                         |
| Berends et al. 1999            | Hypotonia, feeding problems, motor delay, scoliosis, joint laxity                |
| Miyoshi et al. 1998            | Hypotonia, feeding problems, motor delay, scoliosis                              |
| Splitt and Goodship. 1997      | Motor delay, scoliosis                                                           |
| Tomkins et al. 1996            | Hypotonia, feeding problems, motor delay                                         |
| Coviello et al. 1996           | Hypotonia, motor delay, scoliosis                                                |
| Healey et al. 1994             | Motor delay                                                                      |
| Robinson et al. 1994           | Hypotonia, motor retardation                                                     |
| Antonarakis et al. 1993        | Hypotonia, feeding difficulties, motor delays, scoliosis, hyperextensible joints |
| Pentao et al. 1992             | Diffuse hypotonia, motor retardation                                             |
| Temple et al. 1991             | Poor motor coordination, scoliosis                                               |

|                          |    |
|--------------------------|----|
| • Hypotonia              | 15 |
| • Feeding problems       | 9  |
| • Motor delay            | 16 |
| • Scoliosis              | 7  |
| • Hyperextensible joints | 5  |

Total number of patients = 19

In the lower part of the column is a summary of the musculoskeletal abnormalities.

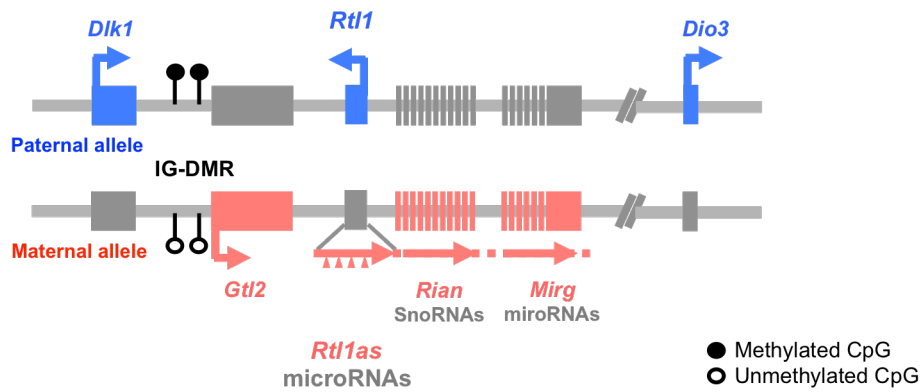

**Fig. S1. Imprinted genes in the distal chromosome 12 in mice.**

There are three coding *Pegs* (blue) and four non-coding *Megs* (red).

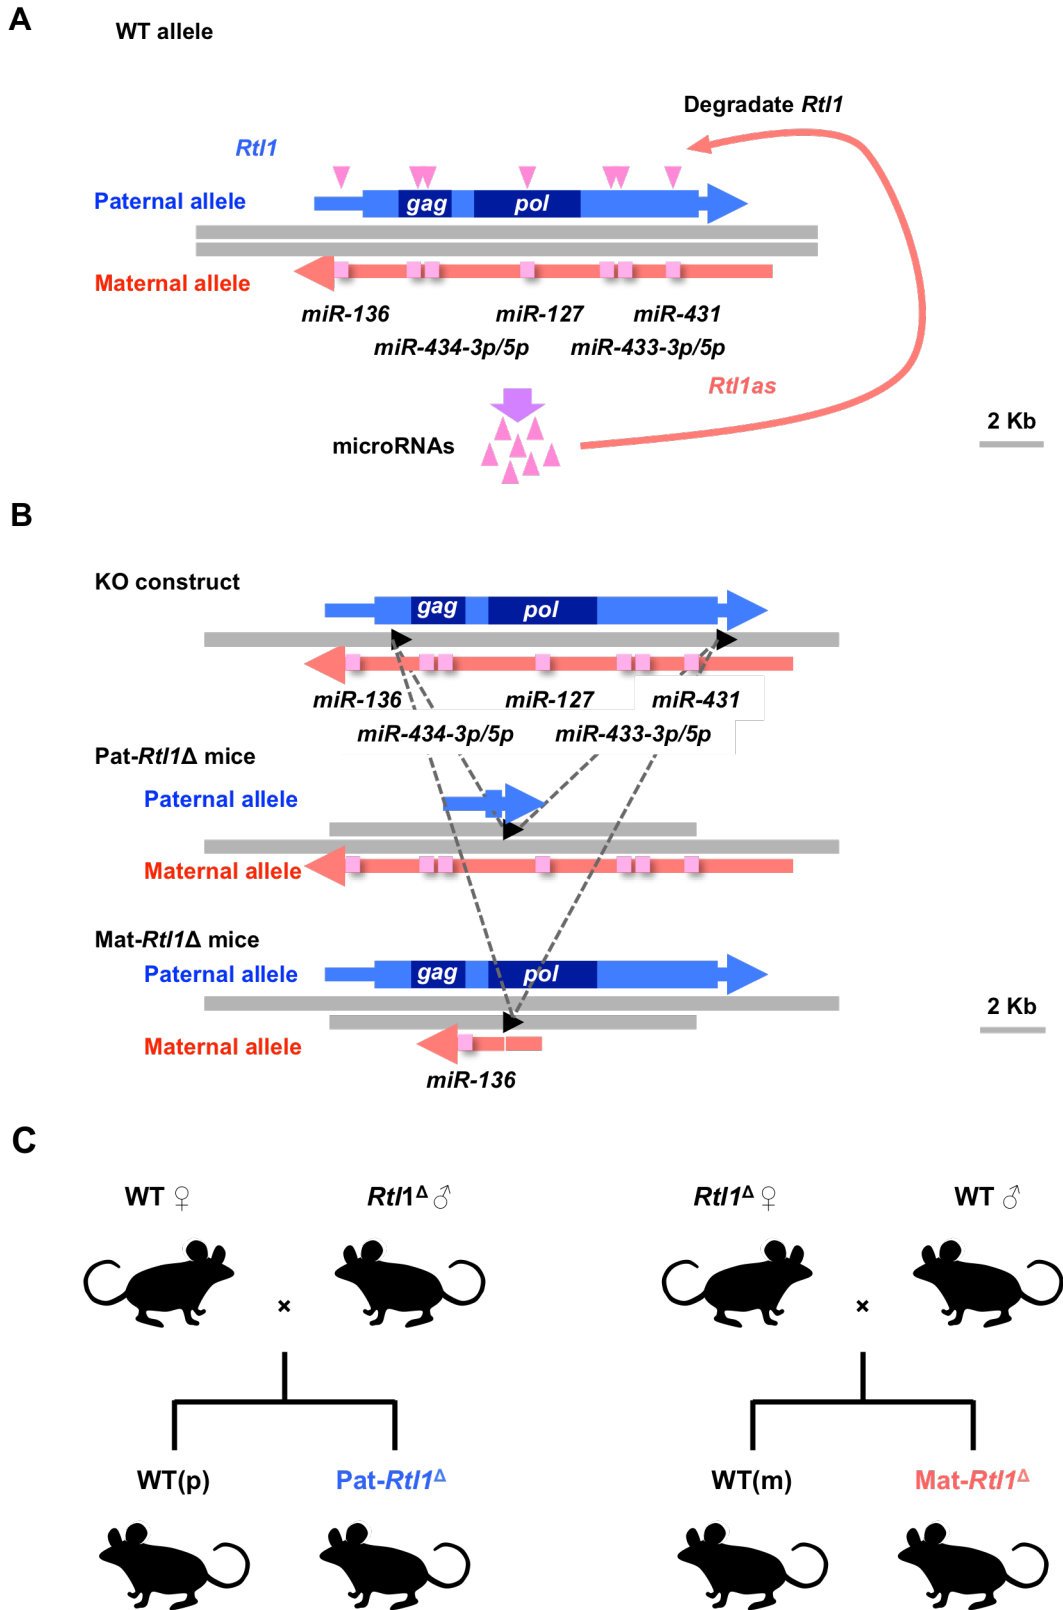

**Fig. S2. Construction of *Rtl1* KO animals.**

(A) The miRNAs in *AntiRtl1as* degrade *Rtl1* mRNA. (B) Construction of *Rtl1* KO animals. (C) A schematic representation of the breeding strategies used to generate Pat-*Rtl1* $\Delta$  and Mat-*Rtl1* $\Delta$  individuals.

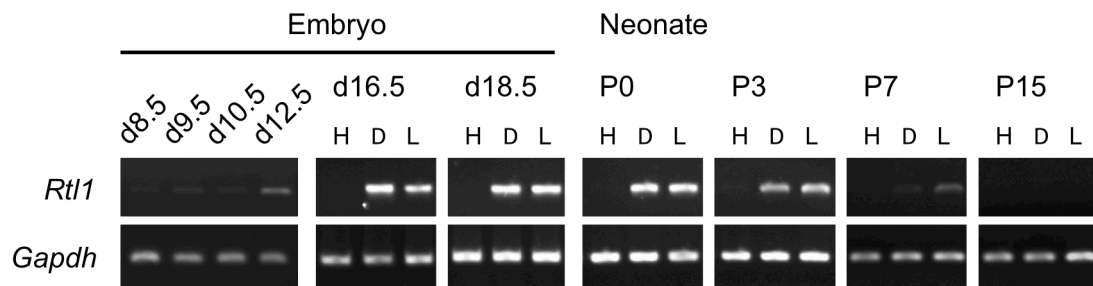

**Fig. S3. *Rtl1* mRNA expression of in embryos, embryonal and neonatal muscles.**

RT-PCR of *Rtl1* in the whole embryo (d8.5-12.5), Heart (H), diaphragm (D), limb muscles (hindlimb: L) in d16.5 and d18.5 embryos and neonates (P0, P3, P7 and P15).

*Rtl1* was expressed at least from d12.5 in embryos. *Gapdh* was used as the control.

Results after 30 cycles of amplification were shown.

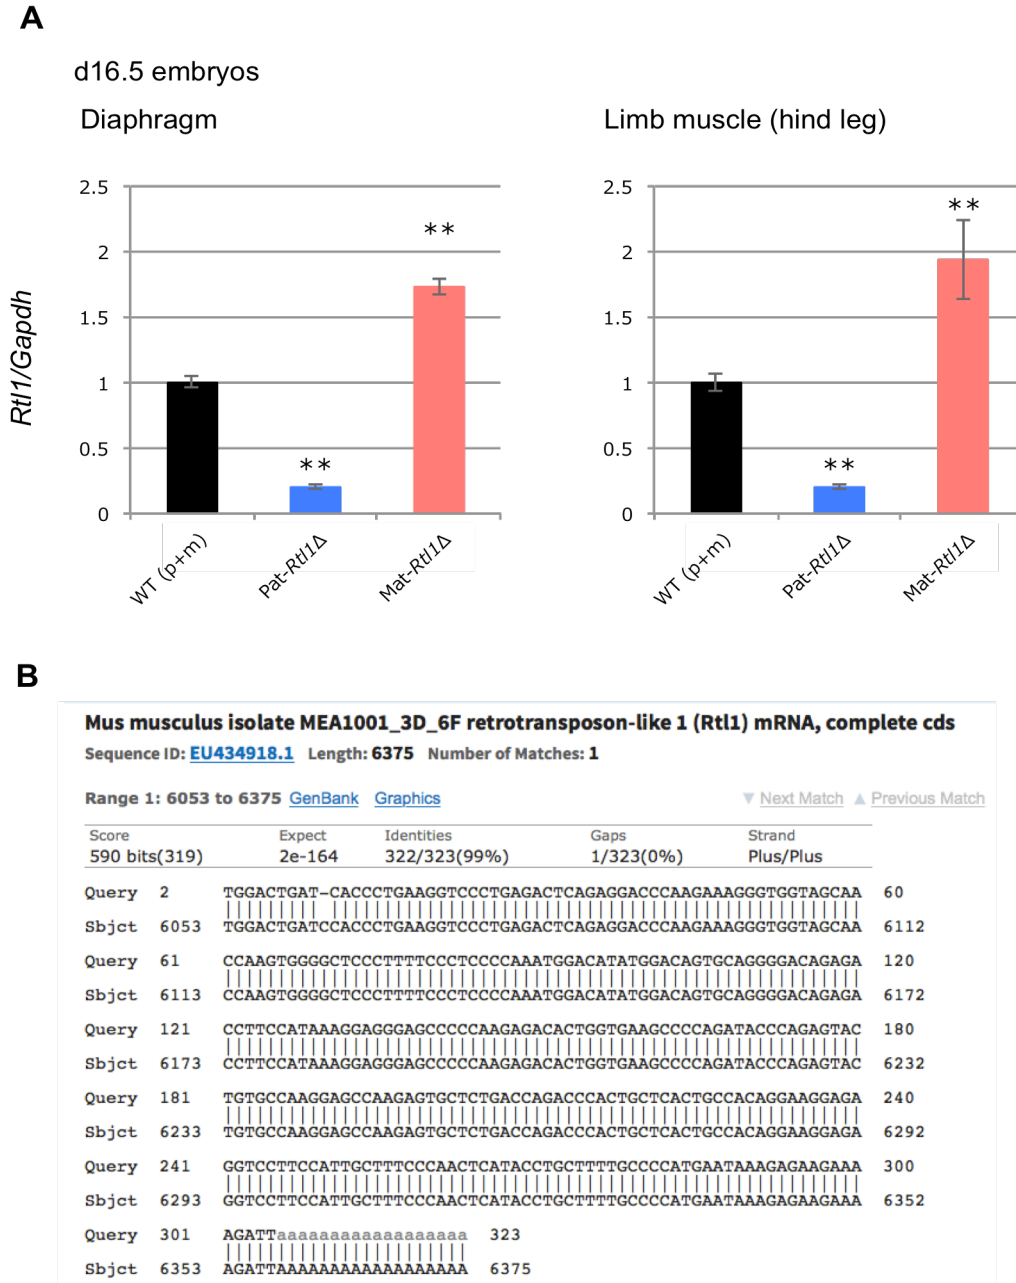

**Fig. S4. *Rtl1* mRNA expression of WT, Pat- and Mat-*Rtl1*Δ.**

(A) Quantitative PCR of *Rtl1* in the diaphragm and hindlimb muscles in d16.5 embryo. WT (black, n=8) was adjusted as 1, Pat-*Rtl1*Δ (blue, n=4) and Mat-*Rtl1*Δ (red, n=4). \*\* p < 0.01. Two-tailed Student's t-test was used for the statistical analysis. Error bars indicate stdev. (B) The PCR product of Pat-*Rtl1*Δ was cloned, sequenced and confirmed to be the *Rtl1* sequence using Standard Nucleotide BLAST (blastn, NCBI nt database).



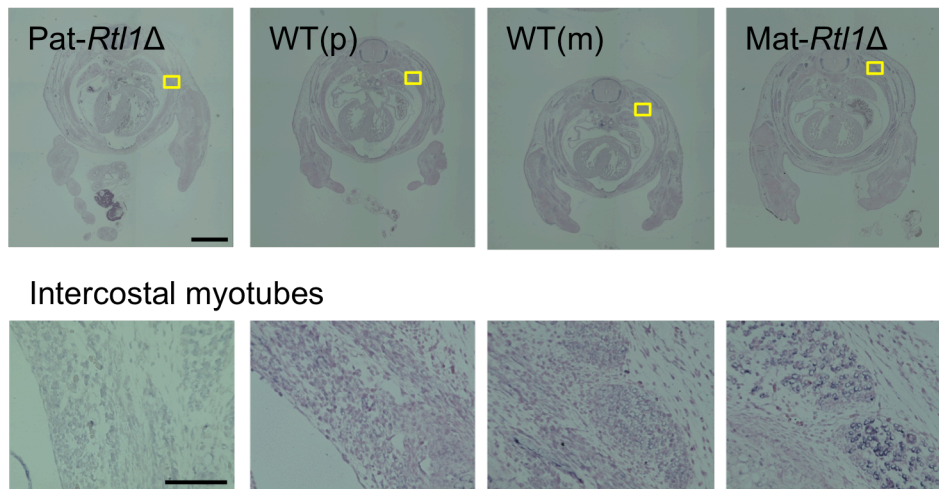

**Fig. S5. Immunohistochemical staining of the RTL1 protein in d14.5 embryos.**

Immunohistochemical staining of a cross-section of the entire embryo (upper column) and a higher magnified view of the intercostal myofibers of the yellow boxes in the upper column (lower column). Pat-*Rtl1*Δ (left), WT (middle) and Mat-*Rtl1*Δ (right). Scale bars, 1mm (upper column), 100 μm (lower column).

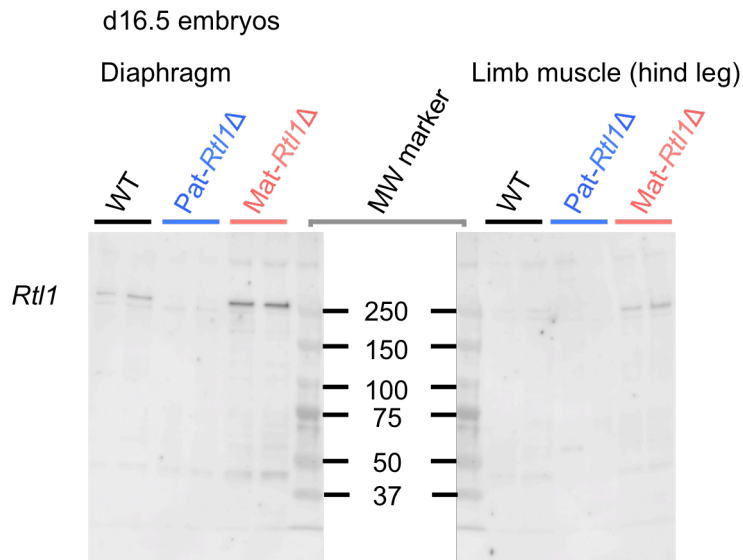

**Fig. S6. RTL1 protein expression of WT, Pat- and Mat-*Rtl1* $\Delta$ .**

Western blotting for RTL1 in the diaphragm and hind limb muscles in d16.5 embryo. WT (left), Pat-*Rtl1* $\Delta$  (middle) and Mat-*Rtl1* $\Delta$  (right).

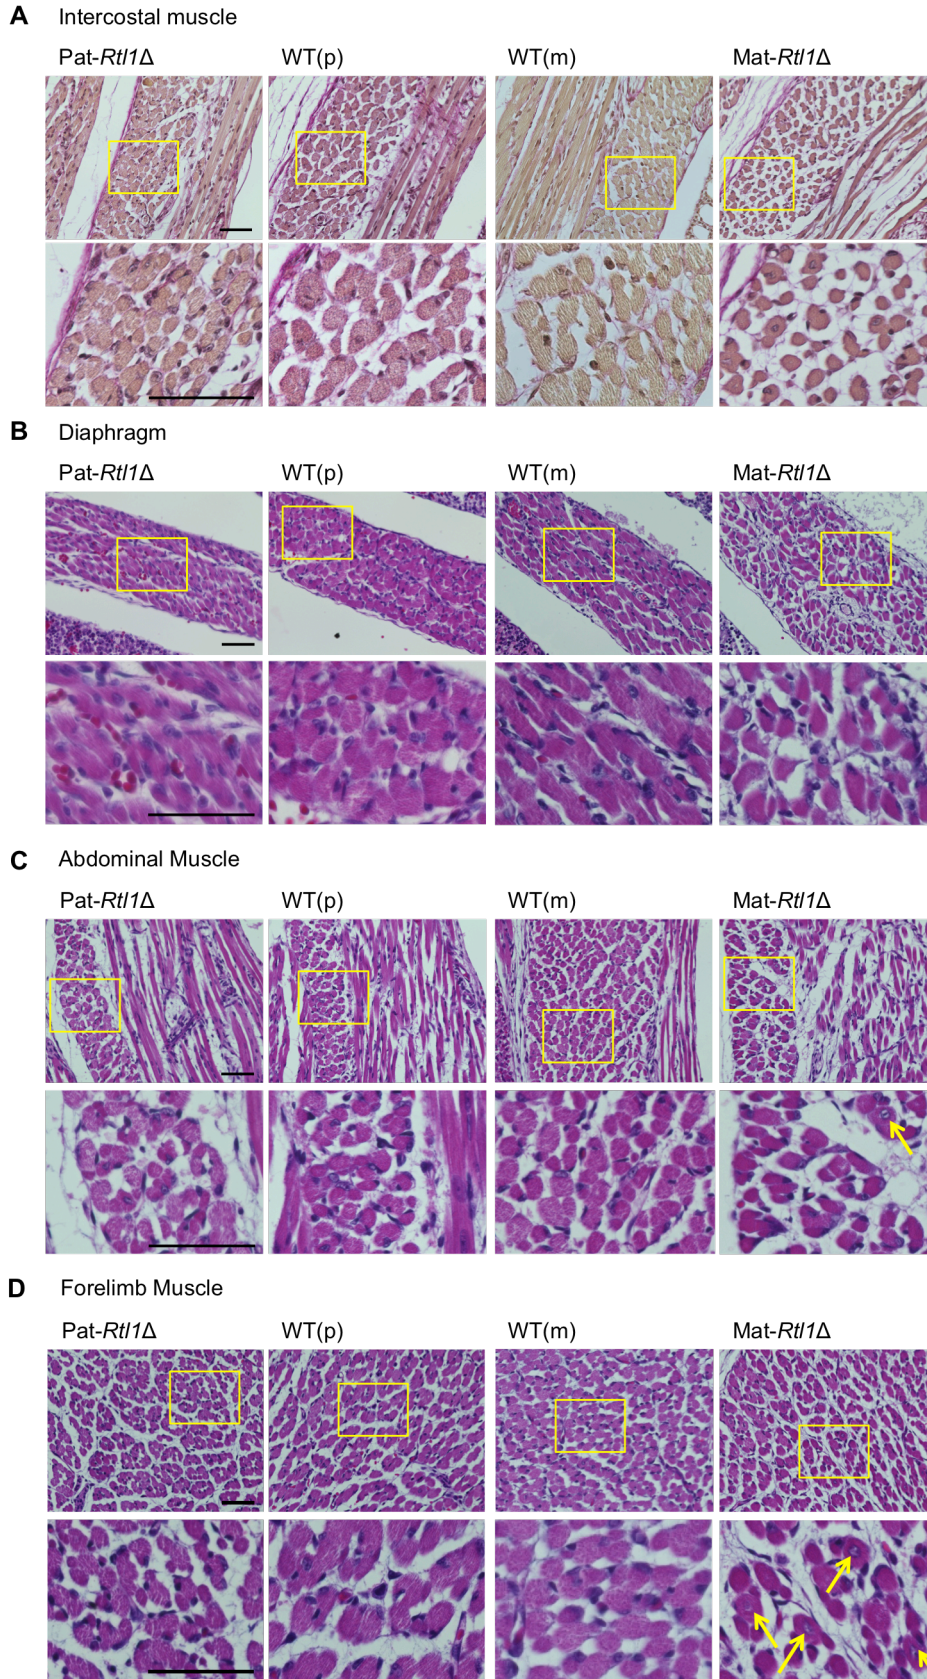

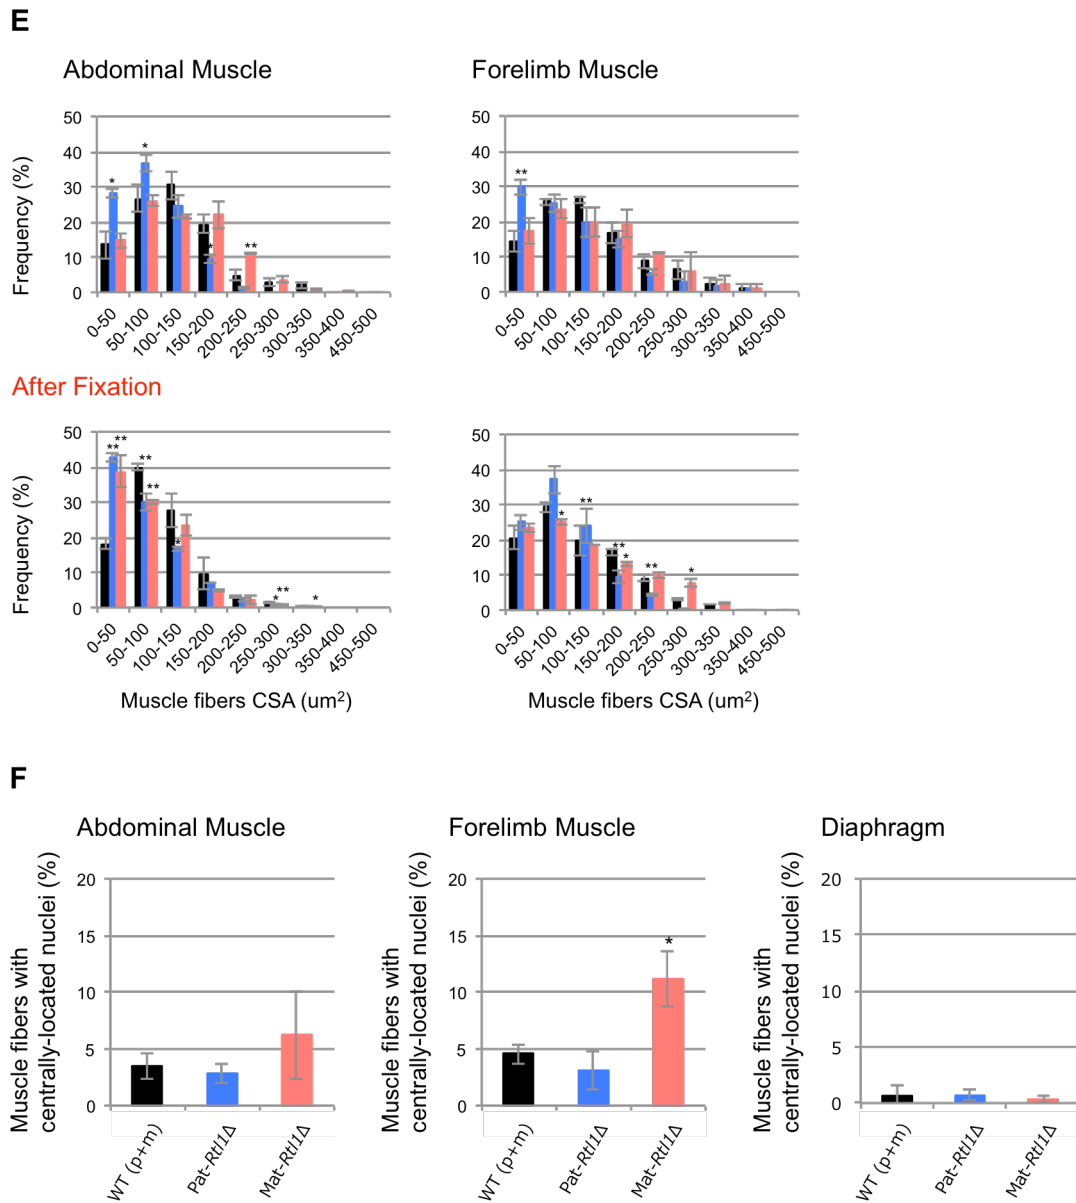

**Fig. S7. Histological abnormalities in muscles of Pat- and Mat-*Rtl1Δ*.**

(A) Elastica van Gieson (EVG) staining in neonate intercostal muscle tissues of Pat-*Rtl1Δ* (left), WT (middle) and Mat-*Rtl1Δ* (right). (B-D) HE staining in neonate intercostal muscle tissues of Pat-*Rtl1Δ* (left), WT (middle) and Mat-*Rtl1Δ* (right). (B) Diaphragm muscle (upper column) and a more highly magnified view of the yellow boxes in the upper column (lower column). (C) abdominal and (D) forelimb muscles. Scale bars, 50 μm. Neonates were fixed in SUPER FIX. (E) Distribution of the muscle

fiber size (cross-sectional area: CSA) in WT (black, n=4), Pat-*Rtl1* $\Delta$  (blue, n=3) and Mat-*Rtl1* $\Delta$  (red, n=3) neonates (non-fixed samples (upper) and fixed samples with SUPER FIX (lower)). (F) Proportion of muscle fibers with centrally-located nuclei (arrows in C and D) between WT (black, n=4), Pat-*Rtl1* $\Delta$  (blue, n=4) and Mat-*Rtl1* $\Delta$  (red, n=4) neonates. Neonates were fixed in SUPER FIX. \*  $p < 0.05$ , \*\*  $p < 0.01$ . Two-tailed Student's t-test was used for the statistical analysis. Error bars indicate stdev.

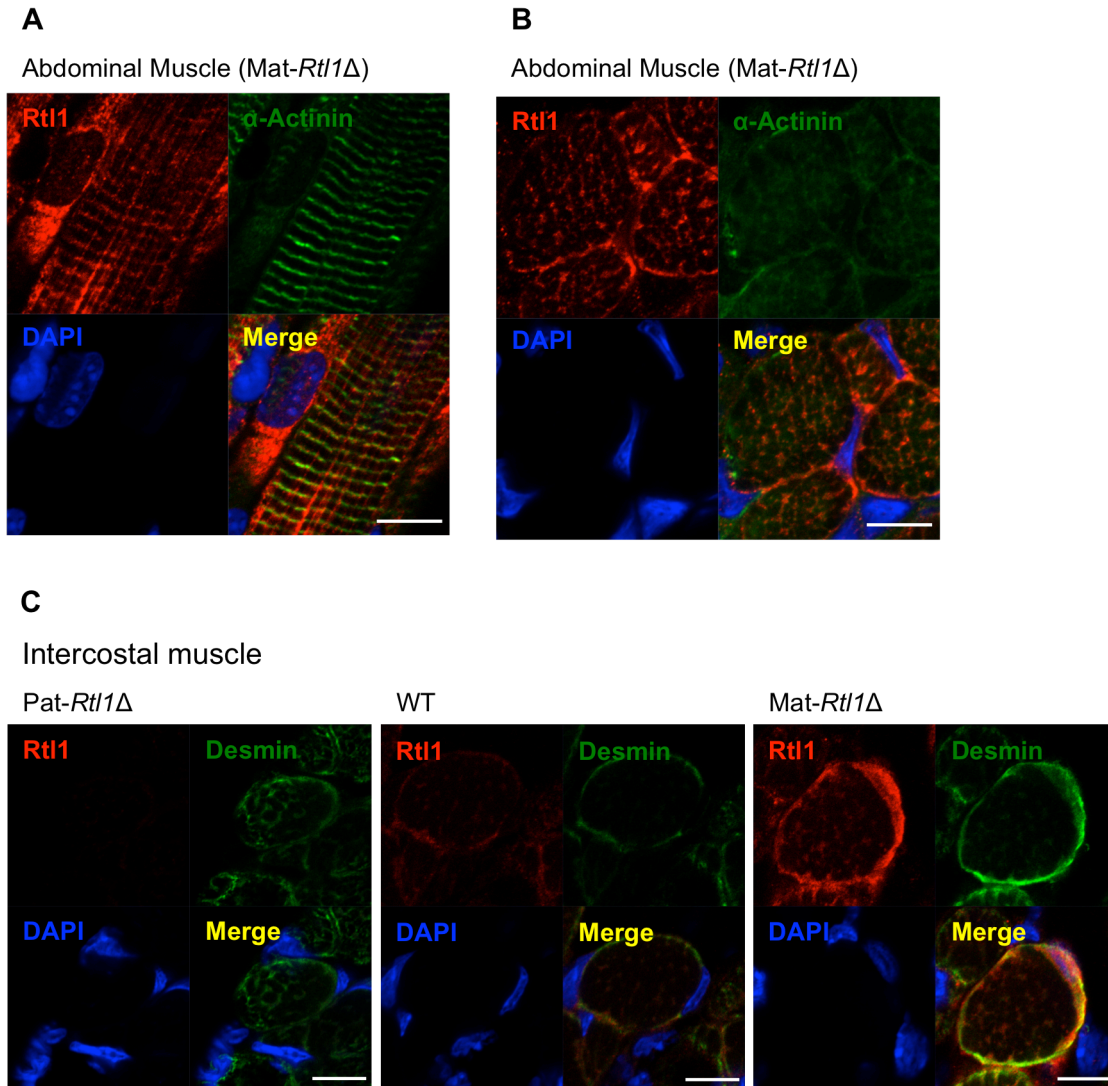

**Fig. S8. Expression of *Rtl1* in the neonatal muscle.**

(A, B) Immunofluorescence staining of RTL1 protein in the neonatal abdominal muscles from Mat-*Rtl1* $\Delta$  mice. Long axis views (A) and cross-sectional views (B) of the muscle fibers of abdominal muscle. Co-immunostaining with RTL1 (red),  $\alpha$ -ACTININ (green) and DAPI (blue), and their merged images. (C) Cross-sectional views of the muscle fibers of intercostal muscle. Co-immunostaining with RTL1 (red), DESMIN (green) and DAPI (blue), and their merged images. Scale bars, 20  $\mu$ m. The neonates were not fixed before being embedded in OCT compound.

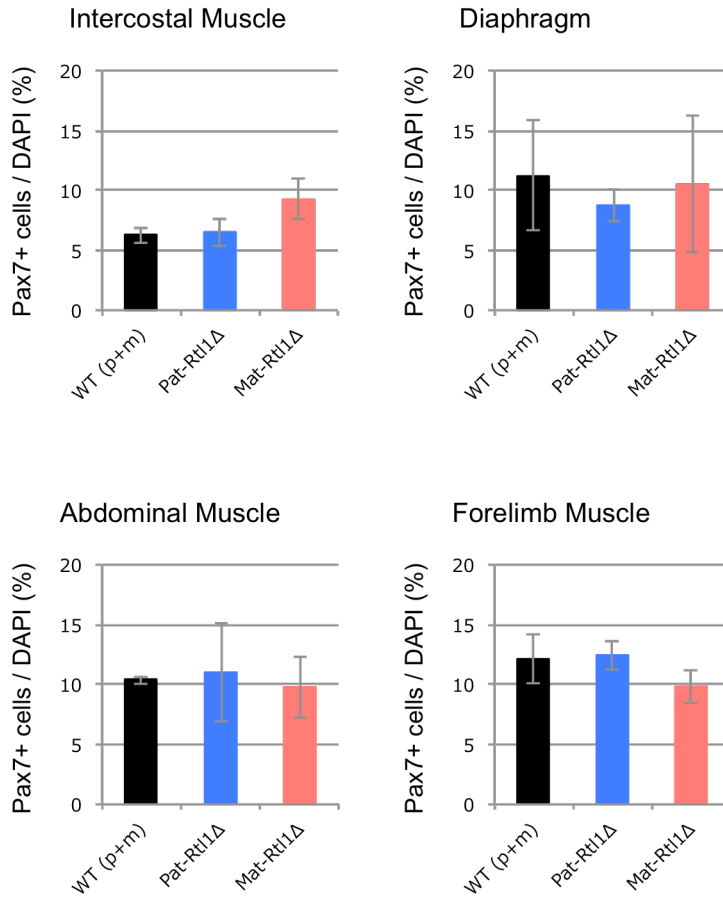

**Fig. S9. Proportion of Pax7+ cells in neonate muscles.**

Proportion of Pax7-positive cells between WT (black, n=3), Pat-*Rtl1*Δ (blue, n=3) and Mat-*Rtl1*Δ (red, n=3) neonates (non-fixed samples). Two-tailed Student's t-test was used for the statistical analysis. Error bars indicate stdev.

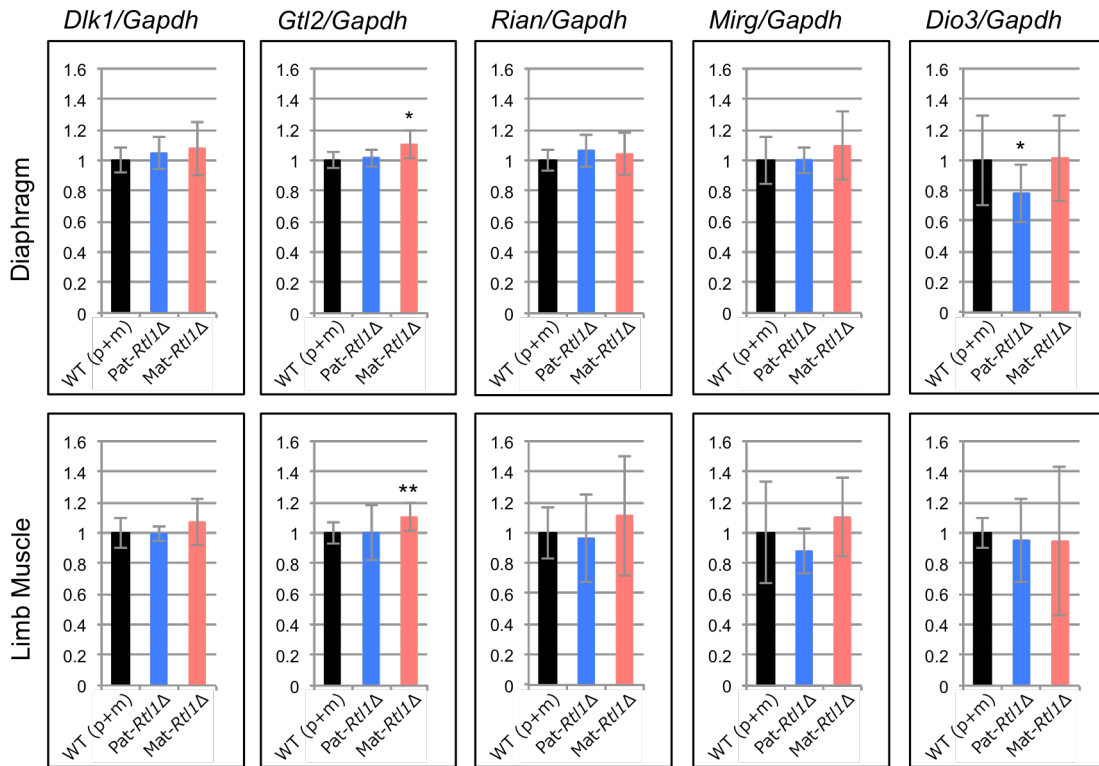

**Fig. S10. Expression of imprinted genes in the distal chromosome 12 in mice fetal muscles.**

Expression level of the imprinted genes in the WT (black, n=8), Pat-*Rtl1*Δ (blue, n=4) and Mat-*Rtl1*Δ (red, n=4) muscle tissues from d16.5 fetuses as determined by qPCR. *Gapdh* was used as the control. Two-tailed Student's t-test was used for the statistical analysis. Error bars indicate stdev.



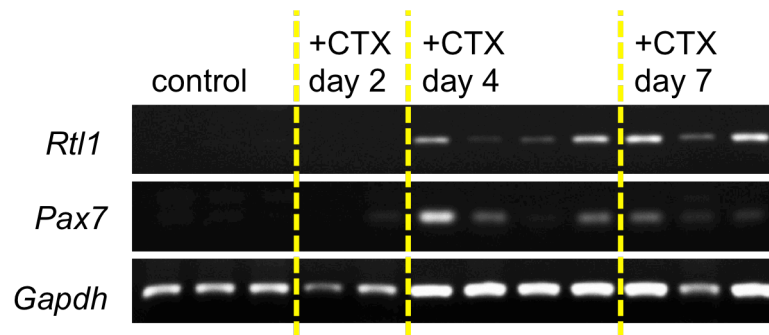

**Fig. S11. Expression of *Rtl1* in muscle regeneration process in adult mice after cardiotoxin (CTX) injury.**

Expression of *Rtl1* and *Pax7* in intact and regenerating *tibialis anterior* (TA) muscles. The animals were sacrificed on day 2 (n=2), 4 (n=4) and 7 (n=3) after CTX injection. *Gapdh* was used as the control. Results after 35 cycles of amplification were shown.
